# Supplementary material for: Highly efficient TiO2 single-crystal photocatalyst with spatially separated Ag and F− bi-cocatalysts: orientation transfer of photogenerated charges and their rapid interfacial reaction
Source: Royal Society of Chemistry journal article supplement (doi:10.1039/c6ta02039a), 2016-01-01
Supplement: c6ta02039a1.pdf [file c6ta02039a1.pdf]

## Supporting Information

### **Highly efficient TiO<sub>2</sub> single-crystal photocatalyst with spatially separated Ag and F<sup>-</sup> bi-cocatalysts: orientation transfer of photogenerated charges and their rapid interfacial reaction**

Xuefei Wang,<sup>a</sup> Tianyi Li,<sup>a</sup> Rui Yu,<sup>a</sup> Huogen Yu<sup>\*a,b</sup> and Jiaguo Yu<sup>c</sup>

<sup>a</sup> School of Chemistry, Chemical Engineering and Life Sciences, Wuhan University of Technology, Wuhan 430070, PR China

<sup>b</sup> State Key Laboratory of Silicate Materials for Architectures, Wuhan University of Technology, Wuhan 430070, PR China.

<sup>c</sup> State Key Laboratory of Advanced Technology for Material Synthesis and Processing, Wuhan University of Technology, Wuhan 430070, PR China.

E-mail: [yuhuogen@whut.edu.cn](mailto:yuhuogen@whut.edu.cn)

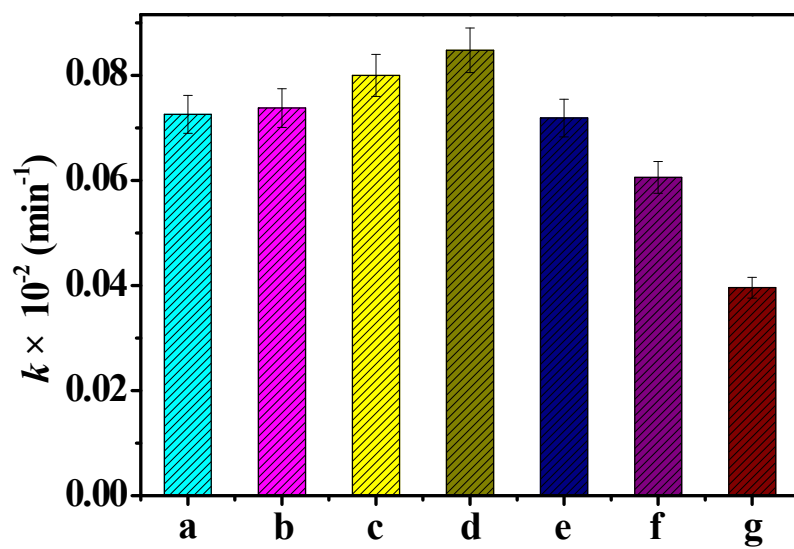

**Fig. S1** The rate constant ( $k$ ) of MO decomposition by Ag/F-TiO<sub>2</sub> single-crystal photocatalysts with various Ag contents: (a) 0 wt%, (b) 0.001 wt%, (c) 0.005 wt%, (d) 0.01 wt%, (e) 0.03 wt%, (f) 0.1 wt%, and (g) 1 wt%.

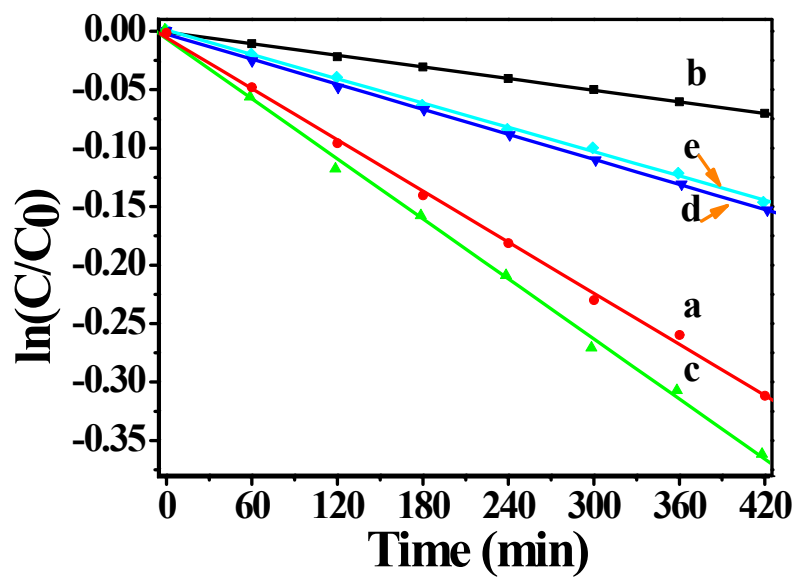

**Fig. S2** The dynamic curves of MO decomposition for various samples: (a) F-TiO<sub>2</sub>, (b) TiO<sub>2</sub>, (c) Ag/F-TiO<sub>2</sub>, (d) Ag/TiO<sub>2</sub>, and (e) Ag/F-TiO<sub>2</sub>(R).

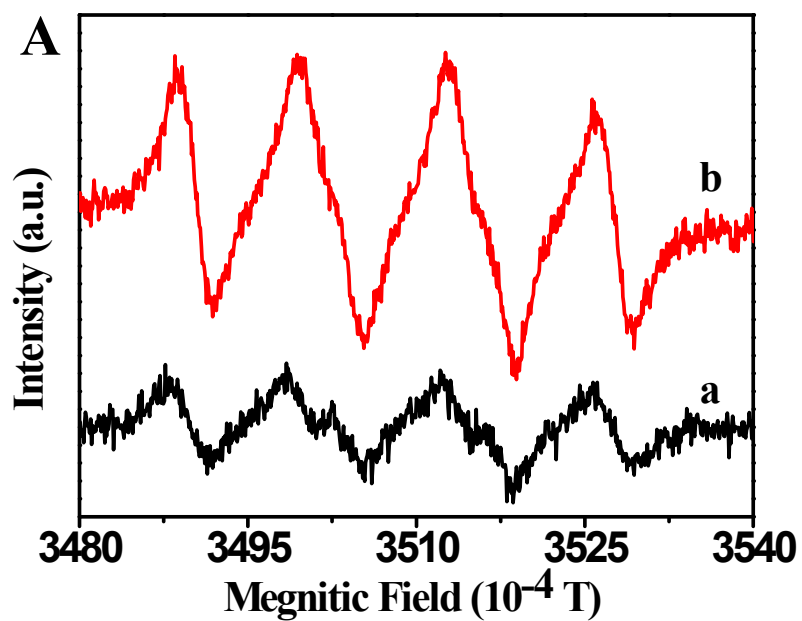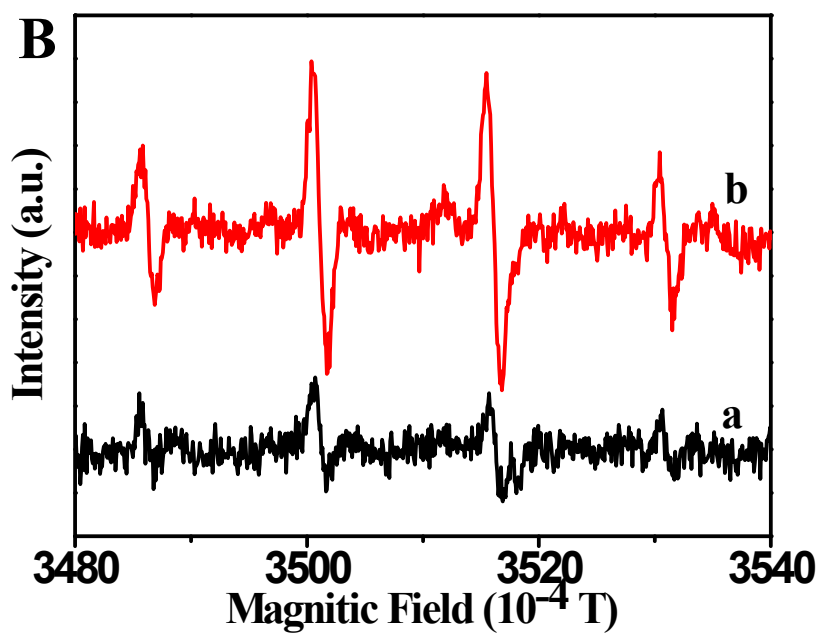

**Fig. S3** ESR spectra of DMPO trapped (A)  $O_2^-$  and (B)  $\cdot OH$  radicals with (a)  $TiO_2$  and (b)  $Ag/F-TiO_2$  under UV-light irradiation.
